# Supplementary material
Source: publisher site journal article supplement (https://www.dovepress.com/article/213968)
Supplement: Supplementary file 1 [file get_supplementary_file.php]

**Cost-effectiveness analysis of ezetimibe as the add-on treatment to moderate-dose rosuvastatin versus high-dose rosuvastatin in the secondary prevention of cardiovascular diseases in China: a Markov model analysis**

# **Supplementary Appendices**

**CONTENTS**

**Supplementary Table 1. Transition probability (combination group)**

**Supplementary Table 2. Transition probability (high-dose statin group)**

**Supplementary Table 3. Costs (study drugs)**

**Supplementary Table 4. Costs (CHD rehospitalization)**

**Supplementary Table 5. Costs (Stroke rehospitalization)**

**Supplementary Table 6. Costs (hospitalization due to adverse event)**

## **Supplementary Table 1. Transition probability (combination group)**

| **State** | **Base-case** | **Max** | **Min** | **distribution** | **Source** |
| --- | --- | --- | --- | --- | --- |
| CHD recurrence | 0.00297 | 0.00372 | 0.00223 | Beta: a 61 b 20555 | 10,16 |
| Stroke recurrence | 0.00118 | 0.00148 | 0.00089 | Beta: a 61 b 51809 | 10,16 |
| CVD related death | 0.00859 | 0.01074 | 0.00645 | Beta: a 61 b 7029 | 10,16 |
| Non-CVD related death | 0.00599 | 0.00749 | 0.00449 | Beta: a 61 b 10137 | 10,16 |

Abbreviations: CHD: coronary heart disease; CVD: cardiovascular disease; Max: maximum value; Min: minimum value.

## **Supplementary Table 2. Transition probability (high-dose statin group)**

| **State** | **Base-case** | **Max** | **Min** | **distribution** | **Source** |
| --- | --- | --- | --- | --- | --- |
| CHD recurrence | 0.00333 | 0.00416 | 0.00249 | Beta: a 61 b 18362 | 10,16 |
| stroke recurrence | 0.00132 | 0.00165 | 0.00099 | Beta: a 61 b 46301 | 10,16 |
| CVD related death | 0.00961 | 0.01202 | 0.00721 | Beta: a 61 b 6271 | 10,16 |
| Non-CVD related death | 0.00670 | 0.00838 | 0.00503 | Beta: a 61 b 9049 | 10,16 |
| ADR in CHD population | 0.01644 | 0.02055 | 0.01233 | Beta: a 60 b 3616 | 10,16 |
| ADR in Stroke population | 0.00397 | 0.00496 | 0.00298 | Beta: a 61 b 15366 | 10,16 |

Abbreviations: ADR: adverse reaction; CHD: coronary heart disease; CVD: cardiovascular disease; Max: maximum value; Min: minimum value.

## **Supplementary Table 3. Costs (study drugs)**

| **Parameters** | **Rosuvastatin tablets (outpatient), CNY** | **Rosuvastatin tablets (inpatient), CNY** | **Ezetimibe, CNY** |
| --- | --- | --- | --- |
| Dosage | 10mg*7 | 10mg*7 | 10mg*5 |
| Price | 69.00 | 49.25 | 74.50 |
| Combined medication daily medication drug fee | 9.86 | 7.04 | 14.90 |
| High-dose daily treatment drugs fee | 19.71 | 14.07 |  |
| Manufacturer | IPR-IPR Pharmaceuticals, INC, Puerto Rico/YG-UK Aventis Pharma (Dagenham) | Astrakang Pharmaceutical Co., Ltd. | United States Schering-Plough Products LLC |

Event-free annual cost of the combination group: 9,037.40 CNY

Event-free annual cost of the high-dose group: 7,194.15 CNY

## **Supplementary Table 4. Costs (CHD rehospitalization)**

| **Parameters** | **Base-case, CNY** | **Max, CNY** | **Min, CNY** | **Distribution** |
| --- | --- | --- | --- | --- |
| Hospitalization cost | 8,864.49 | 159,429.00 | 823.24 | Gamma (α 88.6 , β 100) |
| Hospitalization days (days) | 3 |  |  |  |
| Daily cost for hospitalization | 2,954.83 | 53,143.00 | 274.41 |  |
| Bed fee | 140.00 | 45,630.00 | 35.00 |  |
| Nursing fee | 93.00 | 12,979.11 | 13.00 |  |
| Western medicine fee | 1,216.59 | 39,298.80 | 0.00 |  |
| Laboratory fee | 1,107.00 | 26,484.00 | 0.00 |  |
| consultation fee | 144.00 | 36,182.92 | 9.00 |  |
| Surgical expenses | 2,261.00 | 29,770.12 | 0.00 |  |
| Inspection fee | 467.00 | 21,315.90 | 12.00 |  |
| Other fees | 1,338.41 | 157,394.51 | 0.00 |  |
| The combination of inpatient drug costs | 2,219.68 | 2,555.44 | 1,687.55 | Gamma (α 22 , β 100) |
| The combination of non hospital drug costs | 2,228.14 | 2,572.71 | 1,703.25 | Gamma (α 22 , β 100) |
| The high dose of inpatient drug costs | 1,757.36 | 2,428.89 | 1,363.60 | Gamma (α 17.6 , β 100) |
| The high dose of non inpatient drug costs | 1,774.29 | 2,463.43 | 1,395.00 | Gamma (α 17.7 , β 100) |

Abbreviations: CHD: coronary heart disease; Max: maximum value; Min: minimum value.

## **Supplementary Table 5. Costs (Stroke rehospitalization)**

| **Parameters** | **Base-case, CNY** | **Max, CNY** | **Min, CNY** | **Distribution** |
| --- | --- | --- | --- | --- |
| Hospitalization cost | 14,340.95 | 46,7547.48 | 1,975.86 | Gamma (α 143 , β 100) |
| Hospitalization days (days) | 9 |  |  |  |
| Daily cost for hospitalization | 1,593.44 | 51,949.72 | 219.54 |  |
| Bed fee | 385.00 | 132,240.00 | 0.00 |  |
| Nursing fee | 521.05 | 20,741.98 | 5.00 |  |
| Western medicine fee | 3,477.83 | 135,015.48 | 0.00 |  |
| Laboratory fee | 2,078.00 | 27,152.00 | 0.00 |  |
| consultation fee | 1,166.00 | 52,446.23 | 11.00 |  |
| Surgical expenses | 0.00 | 43,684.77 | 0.00 |  |
| Inspection fee | 3,642.00 | 24,265.00 | 12.00 |  |
| Other fees | 893.19 | 191,234.21 | 2.18 |  |
| The combination of inpatient drug costs | 2,202.75 | 2,520.90 | 1,656.15 | Gamma (α 22 , β 100) |
| The combination of non hospital drug costs | 2,228.14 | 2,572.71 | 1,703.25 | Gamma (α 22.3 , β 100) |
| The high dose of inpatient drug costs | 1,723.50 | 2,359.80 | 1,300.81 | Gamma (α 17 , β 100) |
| The high dose of non inpatient drug costs | 1,774.29 | 2,463.43 | 1,395.00 | Gamma (α 17.7, β 100) |

Abbreviations: Max: maximum value; Min: minimum value.

## **Supplementary Table 6. Costs (hospitalization due to adverse event)**

| **Parameters** | **Base-case, CNY** | **Max, CNY** | **Min, CNY** | **Distribution** |
| --- | --- | --- | --- | --- |
| Hospitalization expenses | 7,033.76 | 24,383.19 | 2,770.95 | Gamma (α 70 , β 100) |
| Average daily hospitalization expenses | 1,082.12 | 3,751.26 | 426.30 | Gamma (α 11 , β 100) |
| Hospitalization days (days) | 7 |  |  |  |
| Bed fee | 384.00 | 3,780.00 | 46.00 |  |
| Nursing fee | 138.00 | 1,875.42 | 26.00 |  |
| Western medicine fee | 160.50 | 2,923.80 | 0.00 |  |
| Chinese medicine fee | 2,194.50 | 4,001.00 | 470.00 |  |
| Laboratory fee | 135.00 | 3,963.14 | 29.00 |  |
| consultation fee | 55.00 | 310.00 | 0.00 |  |
| Surgical expenses | 3,438.50 | 5,938.00 | 75.00 |  |
| Inspection fee | 380.95 | 2270.76 | 11.99 |  |
| Other fees | 1,338.41 | 157,394.51 | 0.00 |  |

Abbreviations: Max: maximum value; Min: minimum value.
